# Supplementary material for: Breast cancer mortality as a function of age
Source: publisher site journal article supplement (doi:10.18632/aging.203881), 2022-02-08
Supplement: Supplementary file [file aging-v14i3-203881-supplementary-material-SD1.pdf]

**SUPPLEMENTARY FIGURE**

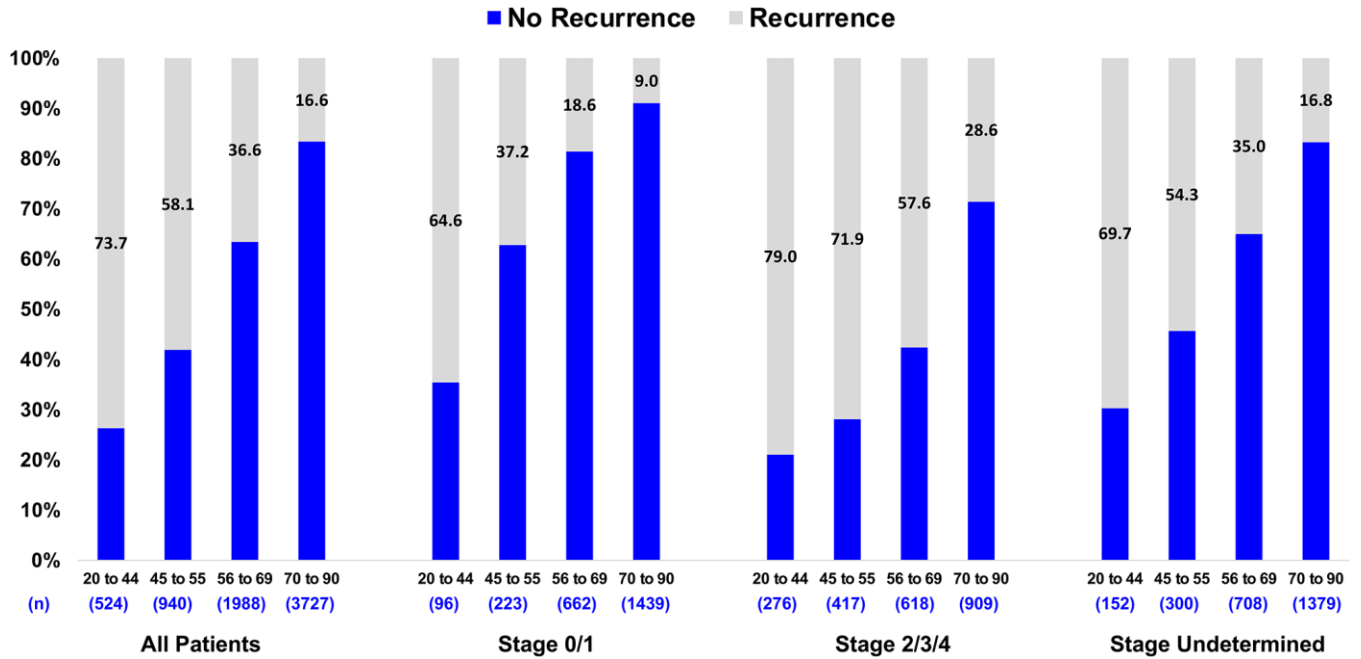

Supplementary Figure 1. 10-year breast cancer recurrence rate (%) among patients who died within 10 years.
